# Supplementary material for: Qin Huang formula enhances the effect of Adriamycin in B-cell lymphoma via increasing tumor infiltrating lymphocytes by targeting toll-like receptor signaling pathway
Source: Springer Nature journal article supplement (doi:10.1186/s12906-022-03660-8), 2022-07-11
Supplement: MOESM4 [file 23256300]

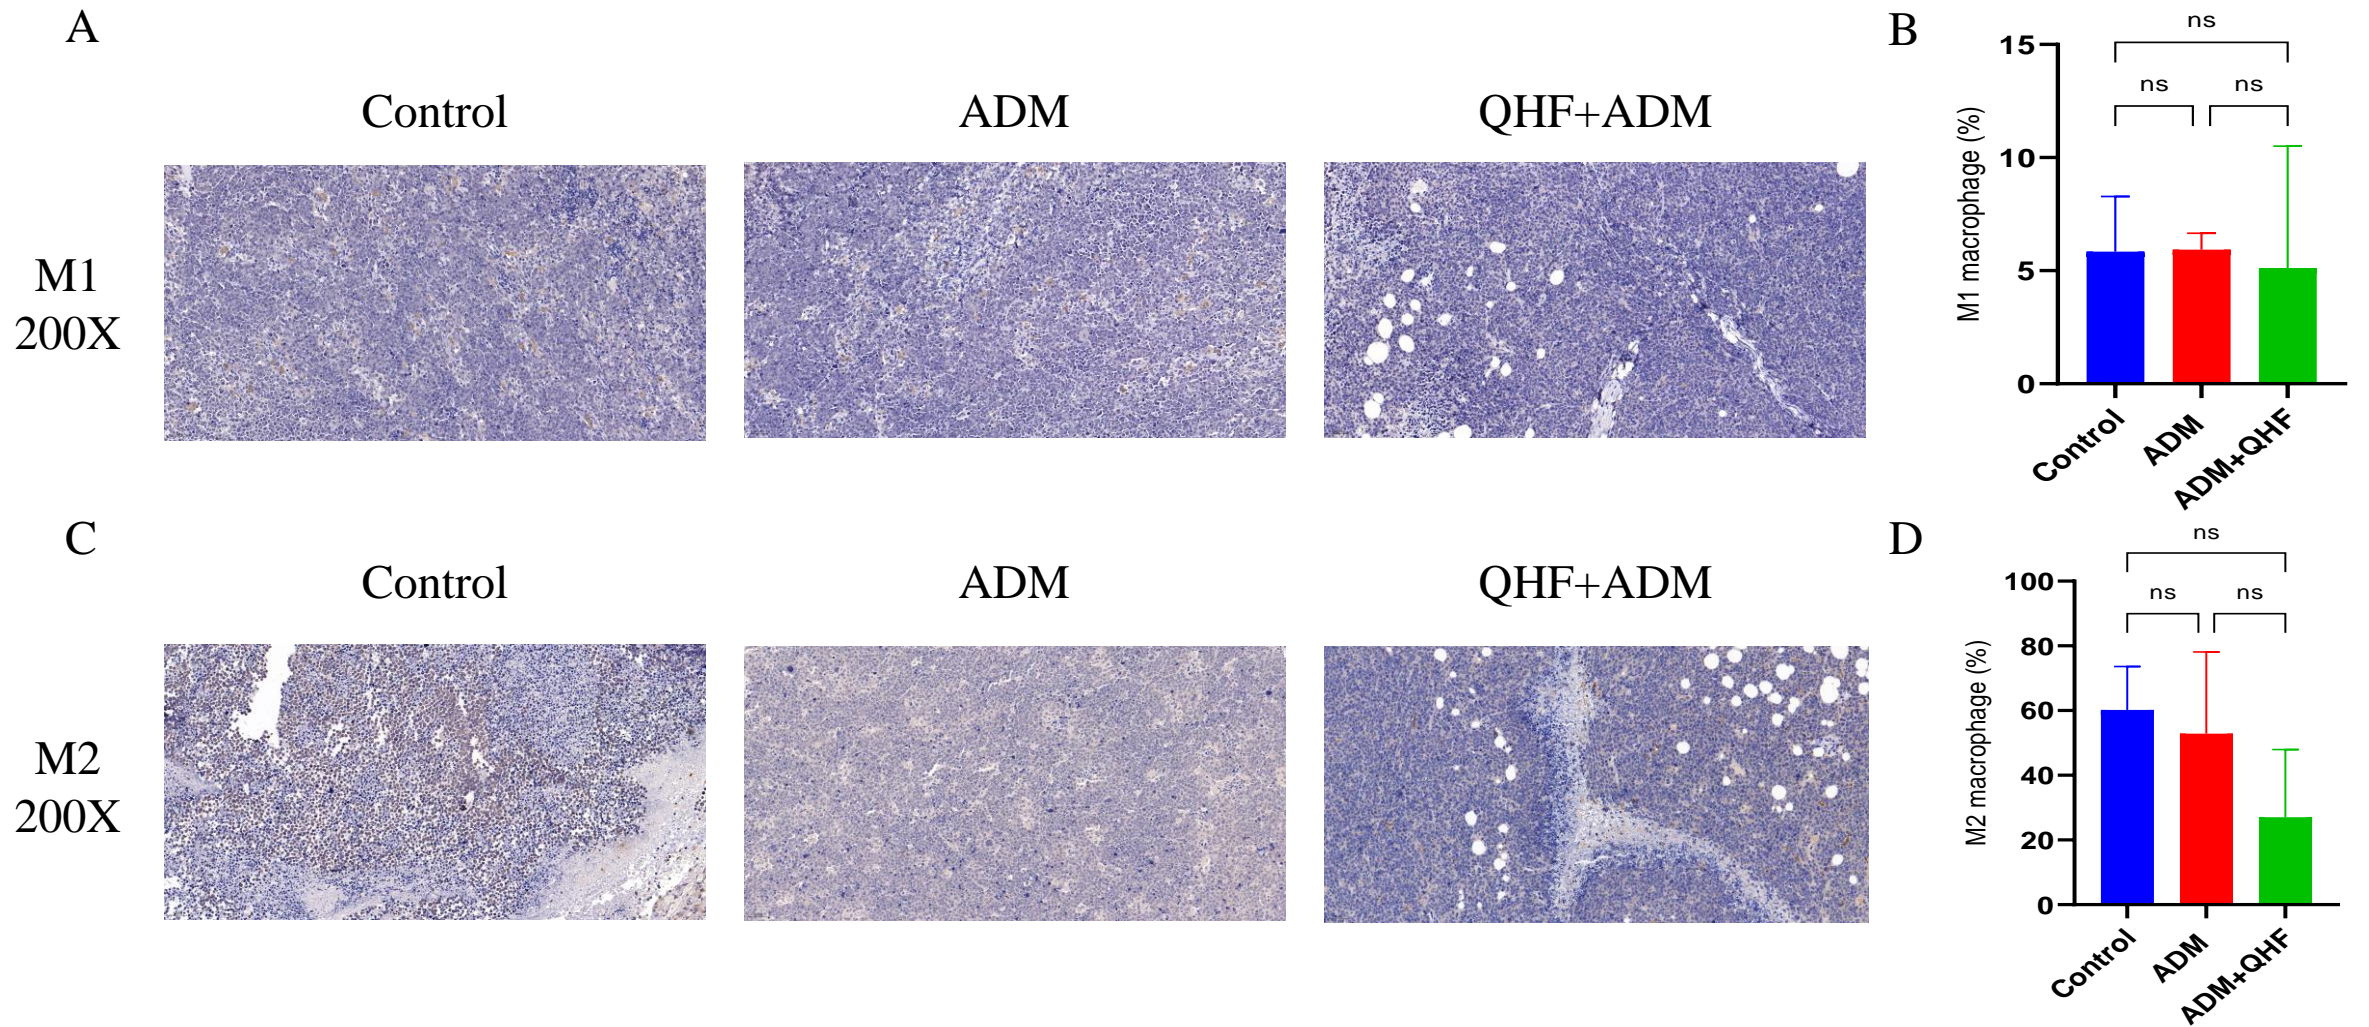

Figure S2. IHC stainings for M1 and M2 macrophages. A. Representative images of IHC staining for M1 macrophages among the three groups (200 $\times$ ). B. Bar plot of the positive cell rate of M1 macrophages of the control group (n=3), ADM group (n=3), and QHF+ADM group (n=3). C. Representative images of IHC staining for M2 macrophages among the three groups (200 $\times$ ). D. Bar plot of the positive cell rate of M2 macrophages of the control group (n=3), ADM group (n=3), and QHF+ADM group (n=3). Ns:  $p>0.05$ .
