# Supplementary material for: Qin Huang formula enhances the effect of Adriamycin in B-cell lymphoma via increasing tumor infiltrating lymphocytes by targeting toll-like receptor signaling pathway
Source: Springer Nature journal article supplement (doi:10.1186/s12906-022-03660-8), 2022-07-11
Supplement: MOESM5 [file 23256300]

A

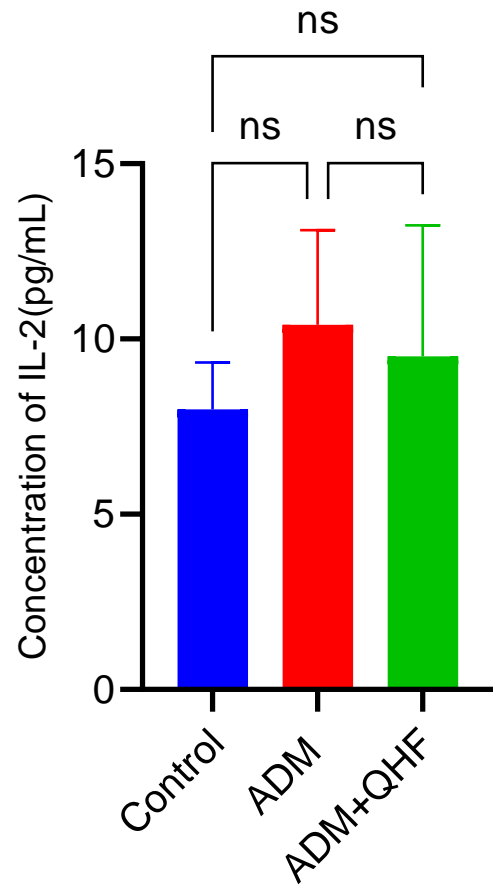

B

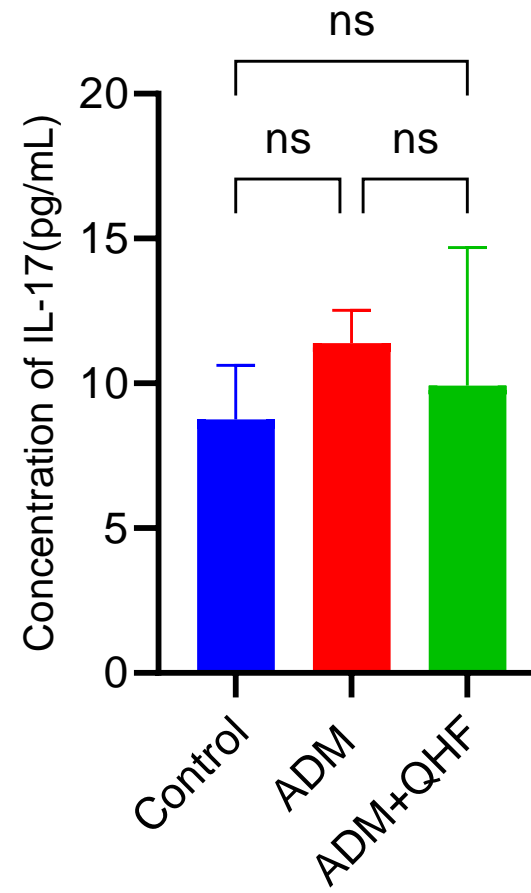

Figure S3. ELISA results of IL-2 and IL-17. A. Concentration of IL-2 of the control group (n=3), ADM group (n=3), and ADM+QHF group (n=3). There is no significant difference between the three groups ( $p>0.05$ ). B. Concentration of IL-17 of the control group (n=3), ADM group (n=3), and ADM+QHF group (n=3). There is no significant difference between the three groups ( $p>0.05$ )
