# Supplementary material for: Qin Huang formula enhances the effect of Adriamycin in B-cell lymphoma via increasing tumor infiltrating lymphocytes by targeting toll-like receptor signaling pathway
Source: Springer Nature journal article supplement (doi:10.1186/s12906-022-03660-8), 2022-07-11
Supplement: MOESM6 [file 23256300]

A

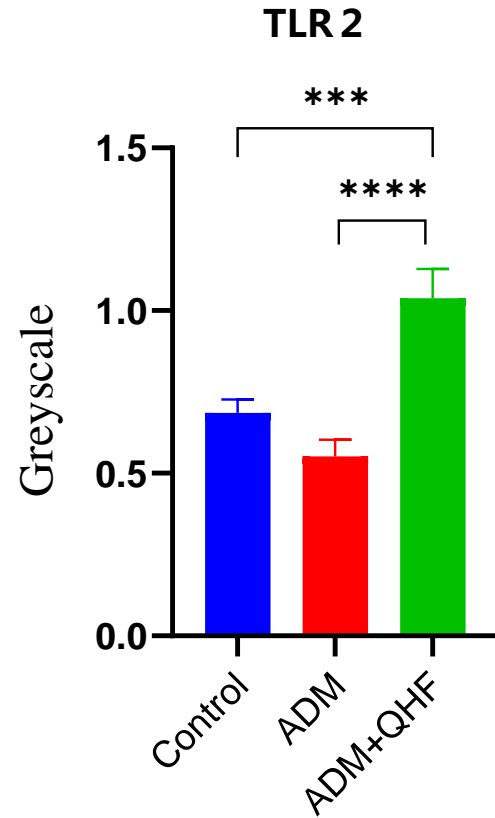

B

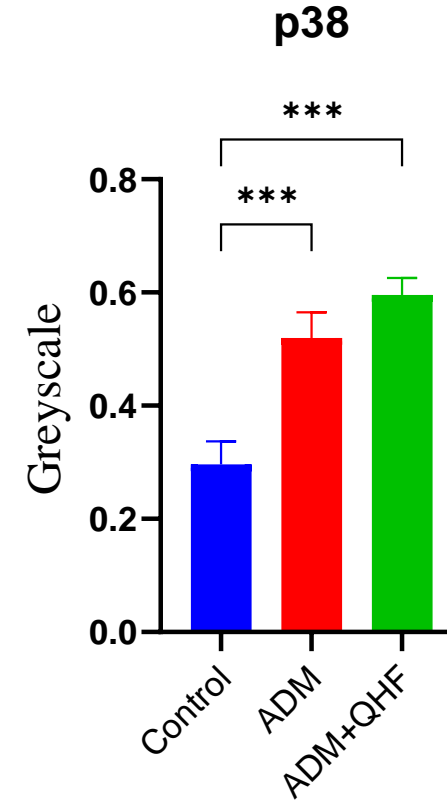

Figure S4. Image J results of the WB bands. A. Bar plot of the expression of TLR2. Compared with the Control group (n=3) and the ADM group (n=3), the ADM+QHF group (n=3) significantly increased the expressions of TLR2 (v.s. Control group, \*\*\* $p < 0.001$ ; v.s. ADM group, \*\*\*\* $p < 0.0001$ ). B. Bar plot of the expression of p38. Compared with the Control group (n=3), the level of p38 MAPK was remarkably increased in ADM group (n=3, \*\*\* $p < 0.001$ ) and ADM+QHF group (n=3, \*\*\* $p < 0.001$ ).
