# Supplementary material for: Qin Huang formula enhances the effect of Adriamycin in B-cell lymphoma via increasing tumor infiltrating lymphocytes by targeting toll-like receptor signaling pathway
Source: BMC Complement Med Ther. 2022 Jul 11;22:185. doi: 10.1186/s12906-022-03660-8 (PMC9272877; doi:10.1186/s12906-022-03660-8)
Supplement: Supplementary file 2 — Additional file 2: Table S1. Total input gene list [file 12906_2022_3660_MOESM2_ESM.xlsx]

## Sheet: Sheet2
Table S1. Total input gene list.
MAPK1
TP53
EP300
AKT1
APP
STAT3
JUN
RELA
MAPK14
MAPK8
TNF
IL6
C3
HSP90AA1
AGT
NFKB1
RAC1
NR3C1
EGFR
RXRA
ESR1
FOS
RHOA
APOB
RB1
SUMO1
FGA
NCOA1
PRKCD
ANXA1
